# Supplementary material for: The Serine Carboxypeptidase-Like Gene SCPL41 Negatively Regulates Membrane Lipid Metabolism in Arabidopsis thaliana
Source: MDPI journal article supplement (doi:10.3390/plants9060696), 2020-05-29
Supplement: s1 [file s1]

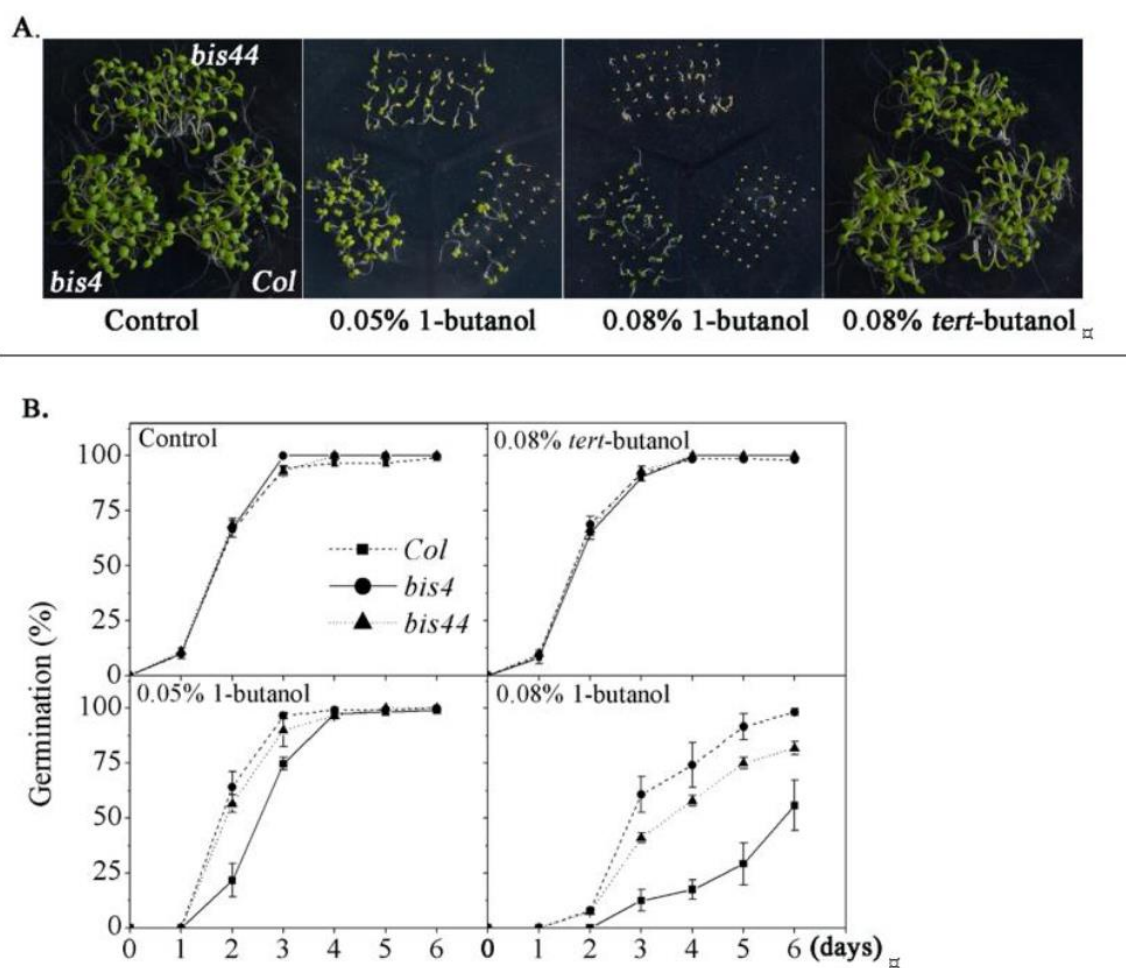

**Figure S1.** *SCPL41* is required for 1-butanol response. **(A)** Visual comparison of *Col*, *bis4*, and *bis44* seed germination and postgerminative growth after 6 d in the absence or presence of 0.05% 1-butanol, 0.08% 1-butanol, or 0.08% *tert*-butanol. The values are the means  $\pm$  SDs ( $n = 120$ ). **(B)** Germination rate of *Col* wild type, *bis4* and *bis44* over 6 d in the absence or presence of 0.05% 1-butanol, 0.08% 1-butanol, or 0.08% *tert*-butanol at indicated times.

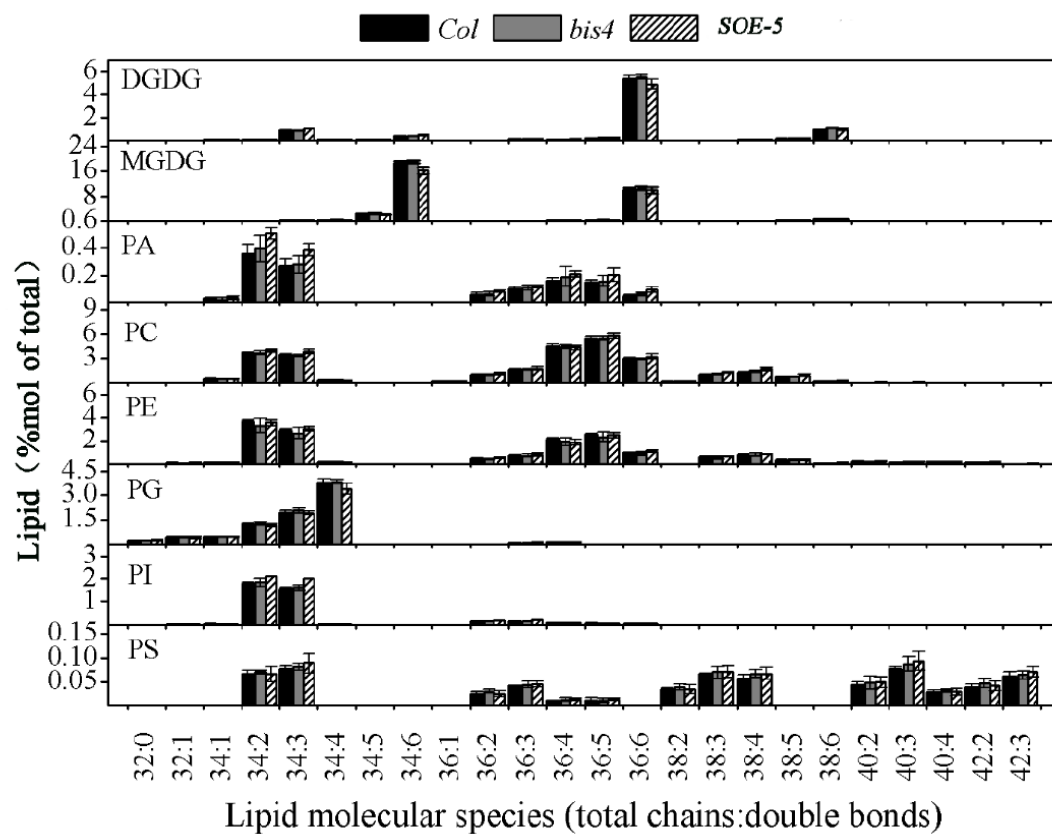

**Figure S2.** Lipid composition within each head-group class in *Col*, *bis4* and *SOE-5* plants. The values are the means  $\pm$  SDs ( $n = 4$  or  $5$ ).
